# Supplementary material for: A Sedimentary Carbon Inventory for a Scottish Sea Loch (Fjord): An Integrated Geochemical and Geophysical Approach
Source: Copernicus journal article supplement (doi:10.5194/bg-2016-245), 2016-06-17
Supplement: Supplementary file 1 [file bg-2016-245-supplement.pdf]

| Basin                                          | Horizon        | Kriging<br>(Linear Interp) |             | Inverse<br>Distance to<br>Power |             | Minimum<br>Curvature |             | Modified<br>Shepard's<br>Method |             | Natural<br>Neighbour |             | Nearest<br>Neighbour |             | Radial Basin<br>Function |             | Triangulation<br>(Linear Interp) |             | Moving<br>Average |             | Local<br>Polynomial |             |
|------------------------------------------------|----------------|----------------------------|-------------|---------------------------------|-------------|----------------------|-------------|---------------------------------|-------------|----------------------|-------------|----------------------|-------------|--------------------------|-------------|----------------------------------|-------------|-------------------|-------------|---------------------|-------------|
|                                                |                | Z<br>Mean                  | Z<br>St.dev | Z<br>Mean                       | Z<br>St.dev | Z<br>Mean            | Z<br>St.dev | Z<br>Mean                       | Z<br>St.dev | Z<br>Mean            | Z<br>St.dev | Z<br>Mean            | Z<br>St.dev | Z<br>Mean                | Z<br>St.dev | Z<br>Mean                        | Z<br>St.dev | Z<br>Mean         | Z<br>St.dev | Z<br>Mean           | Z<br>St.dev |
| Inner                                          | Surface        | 0.148                      | 5.381       | 0.795                           | 7.543       | 0.166                | 9.342       | 0.341                           | 6.404       | 0.373                | 4.460       | 0.080                | 8.421       | -0.308                   | 21.696      | 0.217                            | 4.459       | -1.606            | 23.948      | 1.591               | 12.011      |
|                                                | Holocene Int   | 0.115                      | 5.513       | 0.521                           | 7.533       | 0.108                | 8.996       | 0.101                           | 6.292       | 6.422                | 13.139      | 0.347                | 8.302       | 0.405                    | 64.849      | 0.208                            | 4.680       | -1.658            | 23.899      | 1.586               | 11.403      |
|                                                | G/PG Interface | 0.147                      | 5.574       | 0.304                           | 7.398       | 0.077                | 9.208       | 0.096                           | 6.237       | 0.216                | 4.692       | 0.215                | 7.731       | -0.315                   | 38.672      | 0.203                            | 5.113       | -1.383            | 21.752      | 1.673               | 11.193      |
|                                                | Bedrock        | -0.065                     | 7.780       | -0.544                          | 10.188      | -0.518               | 10.074      | 0.129                           | 7.985       | -0.643               | 7.003       | -0.180               | 10.415      | -0.685                   | 22.481      | -0.681                           | 6.902       | 1.634             | 24.276      | -2.317              | 14.082      |
| Middle                                         | Surface        | 0.122                      | 5.498       | 0.801                           | 8.098       | 0.134                | 9.897       | 0.435                           | 5.999       | 0.408                | 4.988       | 0.067                | 9.811       | -0.598                   | 23.67       | 0.345                            | 5.587       | -1.789            | 21.900      | 1.498               | 12.098      |
|                                                | Holocene Int   | 0.098                      | 5.332       | 0.634                           | 8.456       | 0.105                | 8.213       | 0.114                           | 6.001       | 5.221                | 11.945      | 0.387                | 9.765       | 0.376                    | 71.897      | 0.303                            | 4.987       | -1.854            | 22.897      | 1.556               | 13.001      |
|                                                | G/PG Interface | 0.169                      | 5.781       | 0.299                           | 8.398       | 0.104                | 9.346       | 0.088                           | 6.567       | 0.111                | 5.091       | 0.211                | 8.931       | -0.387                   | 32.677      | 0.567                            | 5.987       | -1.765            | 23.876      | 1.603               | 10.998      |
|                                                | Bedrock        | -0.076                     | 6.987       | -0.448                          | 9.972       | -0.678               | 11.087      | 0.469                           | 8.532       | -0.632               | 6.782       | -0.204               | 11.678      | -0.703                   | 21.567      | -0.456                           | 7.032       | 1.345             | 21.478      | -2.222              | 15.073      |
| Outer                                          | Surface        | 0.156                      | 5.398       | 0.786                           | 8.034       | 0.176                | 9.456       | 0.289                           | 6.867       | 0.556                | 5.123       | 0.089                | 9.002       | -0.445                   | 26.643      | 0.311                            | 4.898       | -1.675            | 23.674      | 1.547               | 12.002      |
|                                                | Holocene Int   | 0.101                      | 5.545       | 0.456                           | 7.001       | 0.087                | 7.891       | 0.105                           | 6.345       | 7.991                | 13.456      | 0.378                | 9.832       | 0.378                    | 67.789      | 0.356                            | 4.698       | -1.798            | 22.111      | 1.497               | 12.768      |
|                                                | G/PG Interface | 0.134                      | 5.678       | 0.201                           | 7.457       | 0.108                | 9.679       | 0.078                           | 6.389       | 0.321                | 5.897       | 0.198                | 10.432      | -0.378                   | 43.734      | 0.689                            | 6.023       | -1.666            | 21.896      | 1.634               | 11.034      |
|                                                | Bedrock        | -0.045                     | 8.012       | -6.045                          | 9.986       | -0.789               | 9.789       | -0.156                          | 7.765       | -0.687               | 7.015       | -0.163               | 13.001      | -0.801                   | 24.834      | -0.389                           | 7.091       | 1.456             | 22.134      | -2.980              | 15.002      |
| Total Times Methodology<br>Ranked in the Top 3 |                | 21                         |             | 0                               |             | 10                   |             | 11                              |             | 9                    |             | 5                    |             | 0                        |             | 12                               |             | 0                 |             | 0                   |             |

| Ranking |  |
|---------|--|
| 1st     |  |
| 2nd     |  |
| 3rd     |  |

**Supplementary Table.1:** Cross validation results (Residual  $Z_{\text{mean}}$  &  $Z_{\text{st.dev}}$ ) for the three basins of Loch Sunart.

**Core no.: GC009, Loch Sunart: 56 40.324'N 05 52.025'W, Depth: 107 m**

| Log | Colour            | Seismic Unit | Description                                                                            | <sup>14</sup> C Age  |
|-----|-------------------|--------------|----------------------------------------------------------------------------------------|----------------------|
|     | 10YR 4/1          |              | 0-15 cm: Washed out (during coring) gravelly, shelly mud (large scallop-like bivalves) | 140 cm<br>10801 ± 91 |
|     | 10YR 4/1<br>5Y4/1 |              |                                                                                        |                      |
| EOC |                   |              |                                                                                        |                      |

| Legend |            |  |                                |
|--------|------------|--|--------------------------------|
|        | Clay       |  | Bivalve shell                  |
|        | Silt       |  | Snail shell                    |
|        | Sandy mud  |  | Plant fragment                 |
|        | Muddy sand |  | Bioturbation degree (high/low) |
|        | Sand       |  |                                |
|        | Gravel     |  |                                |

**Core no.: GC011, Loch Sunart: 56 39.591°N 05 58.178°W, Depth:91 m**

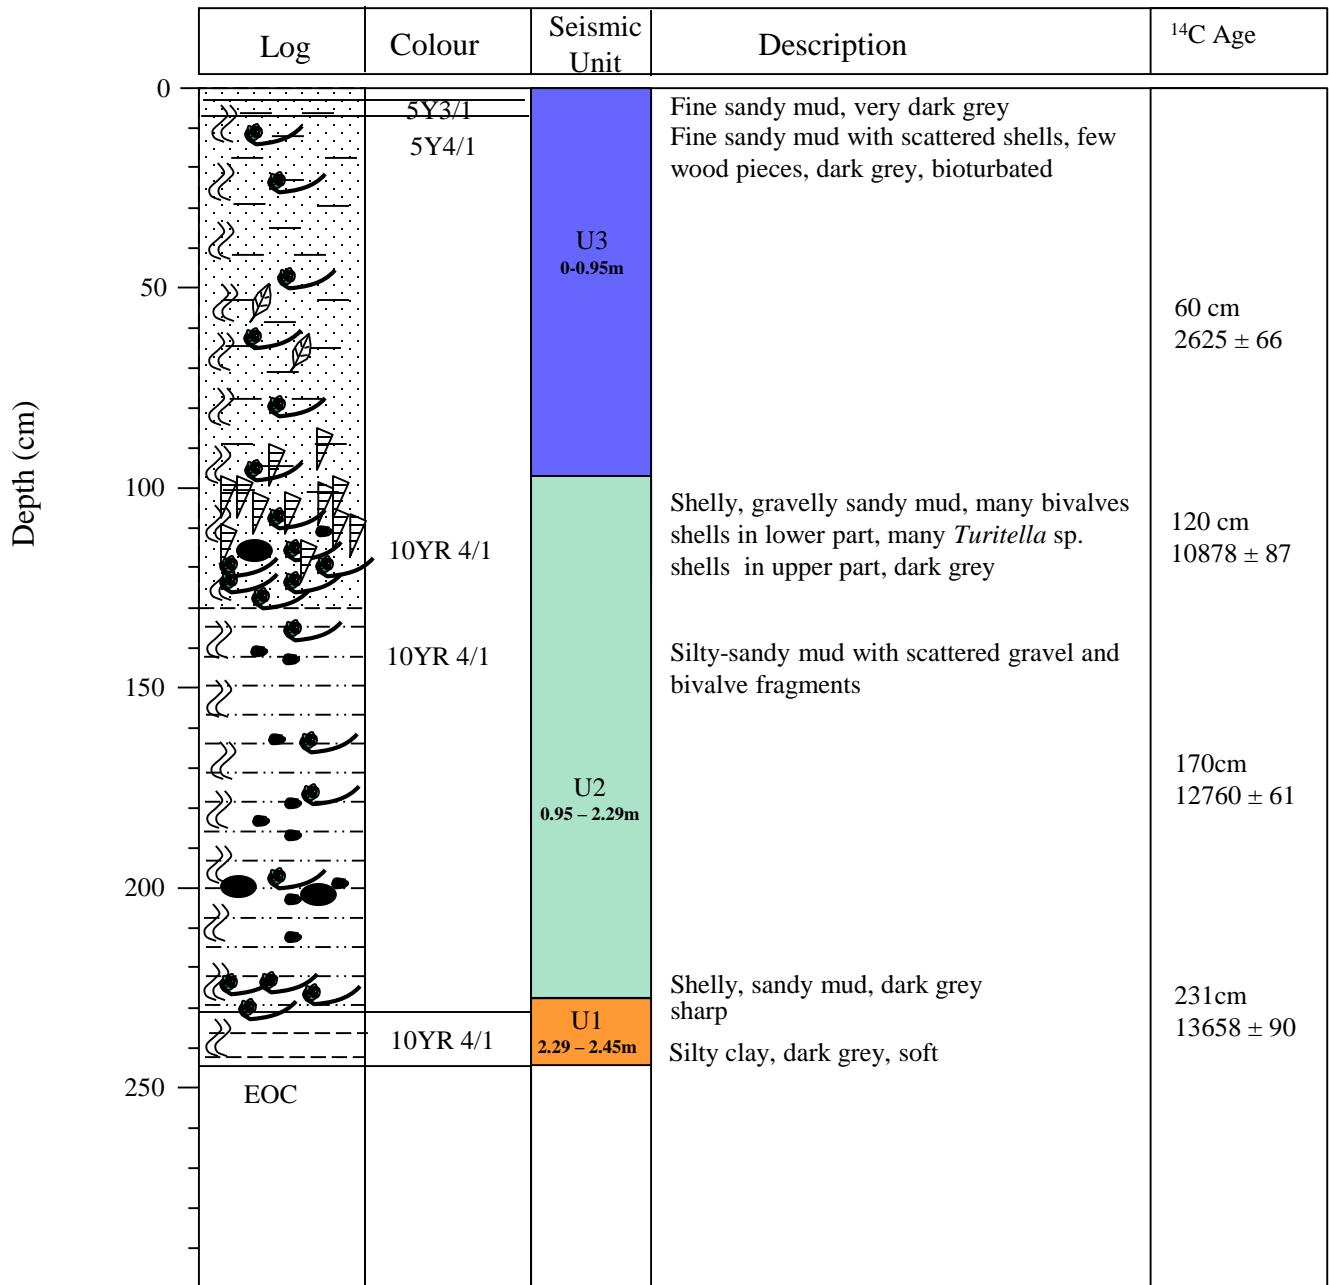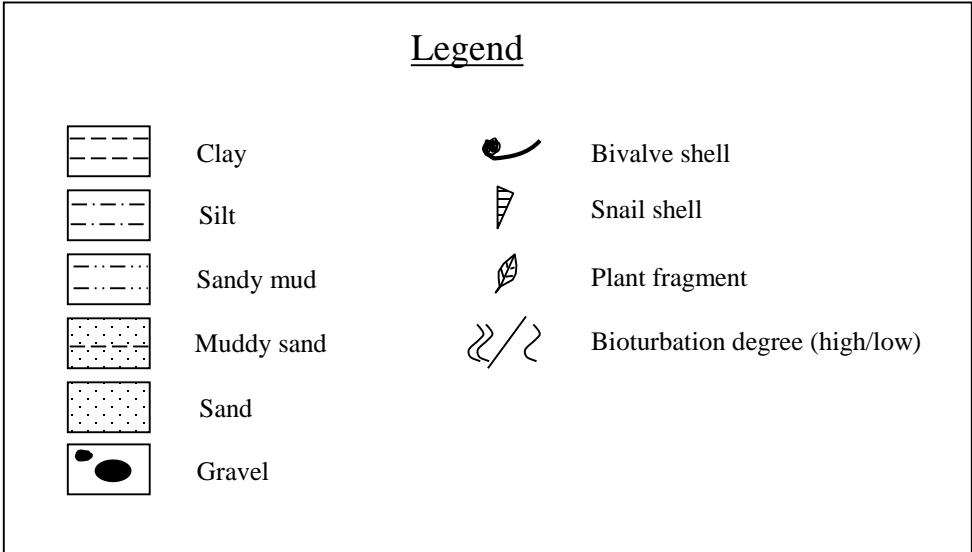

**Core no.:**GC013, **Loch Sunart:** 56 40.879'N 05 37.771'W, **Depth:**87 m

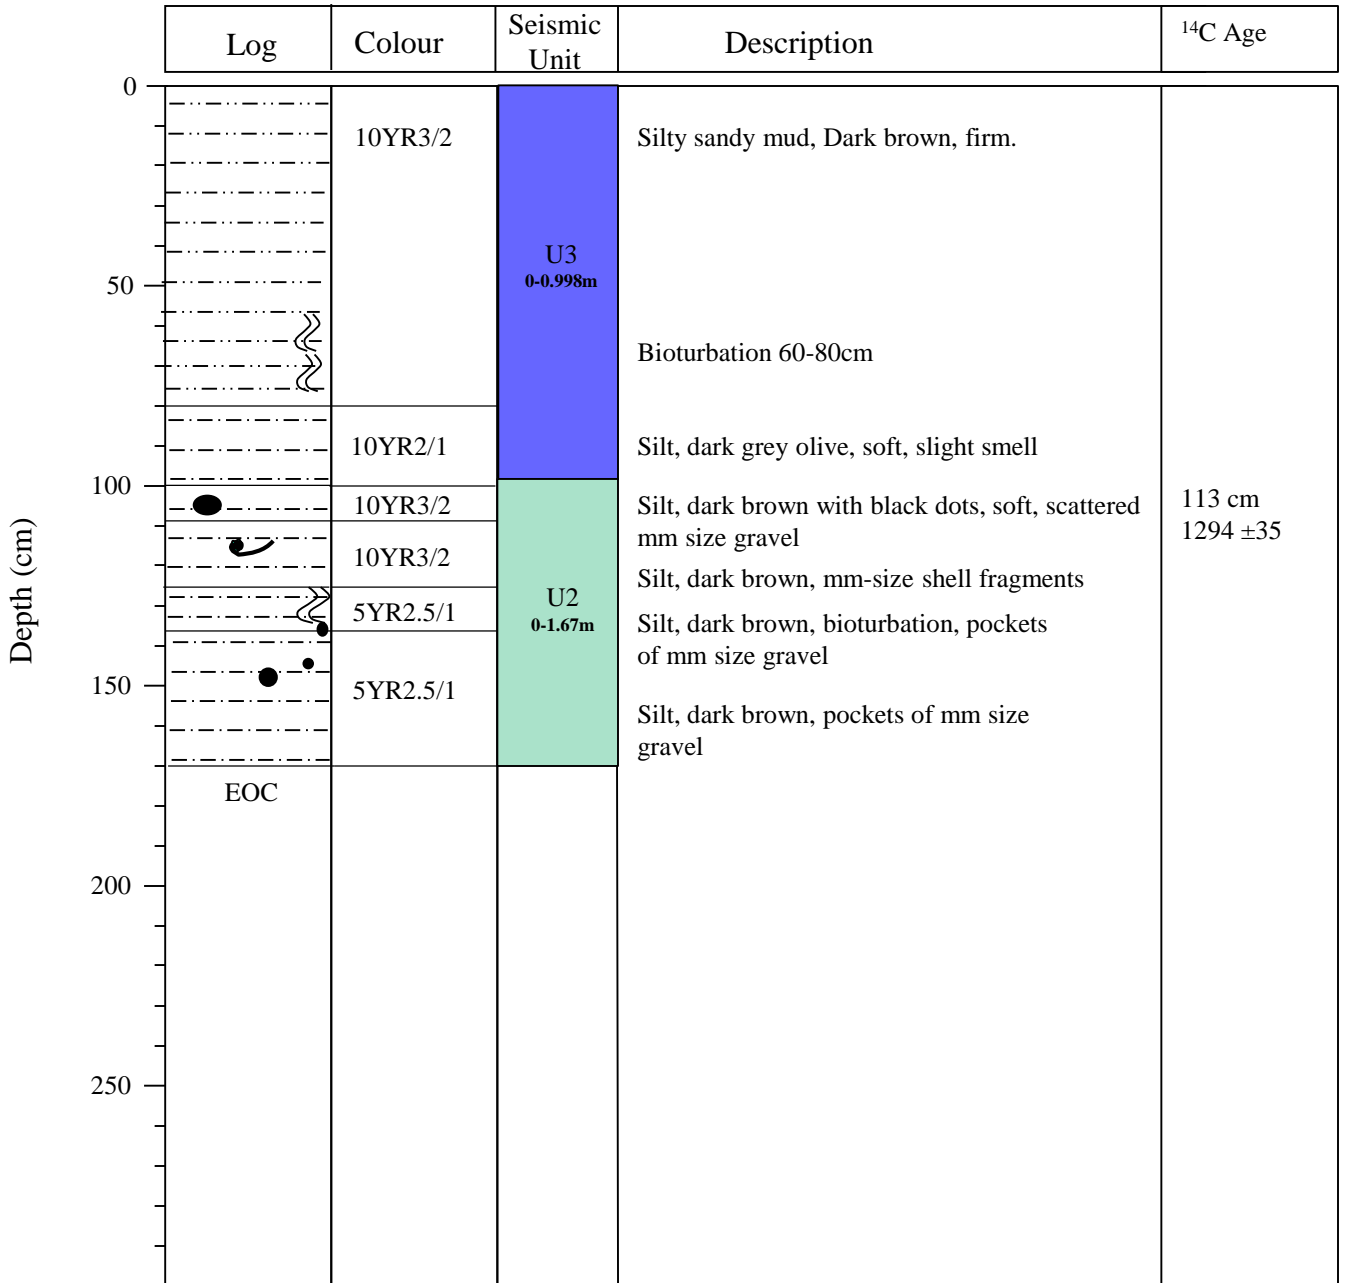

### Legend

|  |            |  |                                |
|--|------------|--|--------------------------------|
|  | Clay       |  | Bivalve shell                  |
|  | Silt       |  | Snail shell                    |
|  | Sandy mud  |  | Plant fragment                 |
|  | Muddy sand |  | Bioturbation degree (high/low) |
|  | Sand       |  |                                |
|  | Gravel     |  |                                |

**Core no.: GC016, Loch Sunart: 56 40.857N 05 38.540W, Depth: 58m**

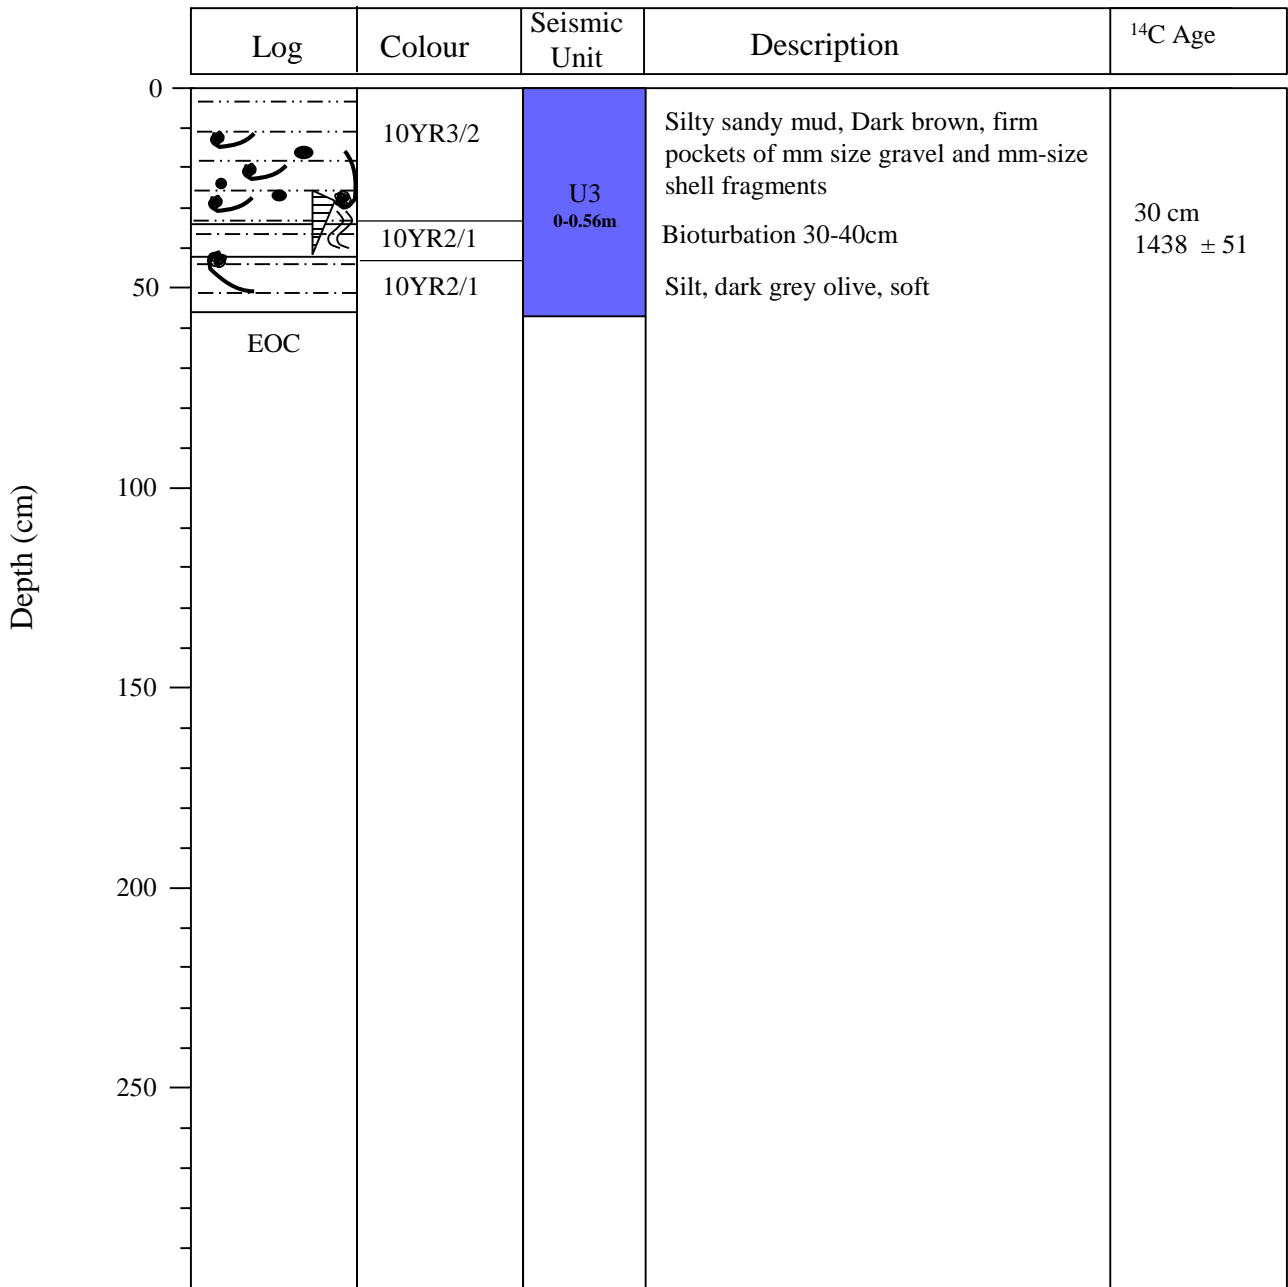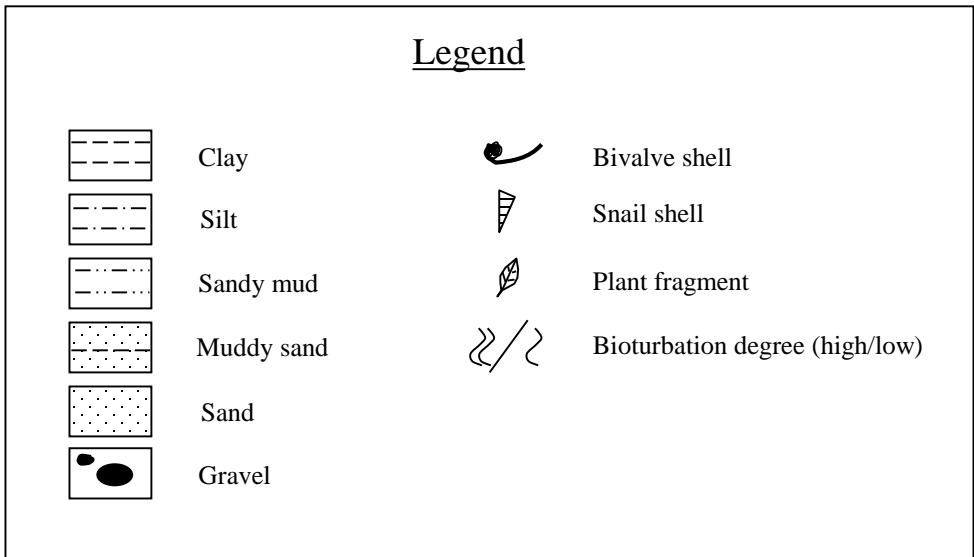

**Core no.: GC020, Loch Sunart: 56 42.257'N 05 45.080'W, Depth: 105 m**

| Log | Colour  | Seismic Unit            | Description                                                                                       | <sup>14</sup> C Age |
|-----|---------|-------------------------|---------------------------------------------------------------------------------------------------|---------------------|
|     | 5Y4/1   | <b>U3</b><br>0-1.15m    | Sany shelly mud, dark grey olive, many bivalves sharp                                             | 9 cm<br>357 ± 44    |
|     | 10YR4/1 |                         | Sandy silty mud, scattered gravel (max. 7 cm diam., dark greyish brown, few bivalves, bioturbated | 19 cm<br>2864 ± 57  |
|     | 10YR4/1 | <b>U2</b><br>1.15-2.38m | Silty mud, dark greyish brown, bioturbated                                                        | 126cm<br>13160 ± 90 |
|     | 10YR4/1 |                         | Sandy shelly, gravelly mud, dark grey olive, many bivalves                                        |                     |
| EOC |         |                         |                                                                                                   |                     |

Depth (cm) is indicated on the left side of the log diagram, ranging from 0 to 250 cm.

Upward: gradual more sand content

Legend

|  |            |  |                                |
|--|------------|--|--------------------------------|
|  | Clay       |  | Bivalve shell                  |
|  | Silt       |  | Snail shell                    |
|  | Sandy mud  |  | Plant fragment                 |
|  | Muddy sand |  | Bioturbation degree (high/low) |
|  | Sand       |  |                                |
|  | Gravel     |  |                                |

**Core no.:** GC022, **Loch Sunart:** 56 40.820 N' 05 48.297 W, **Depth:** 120 m

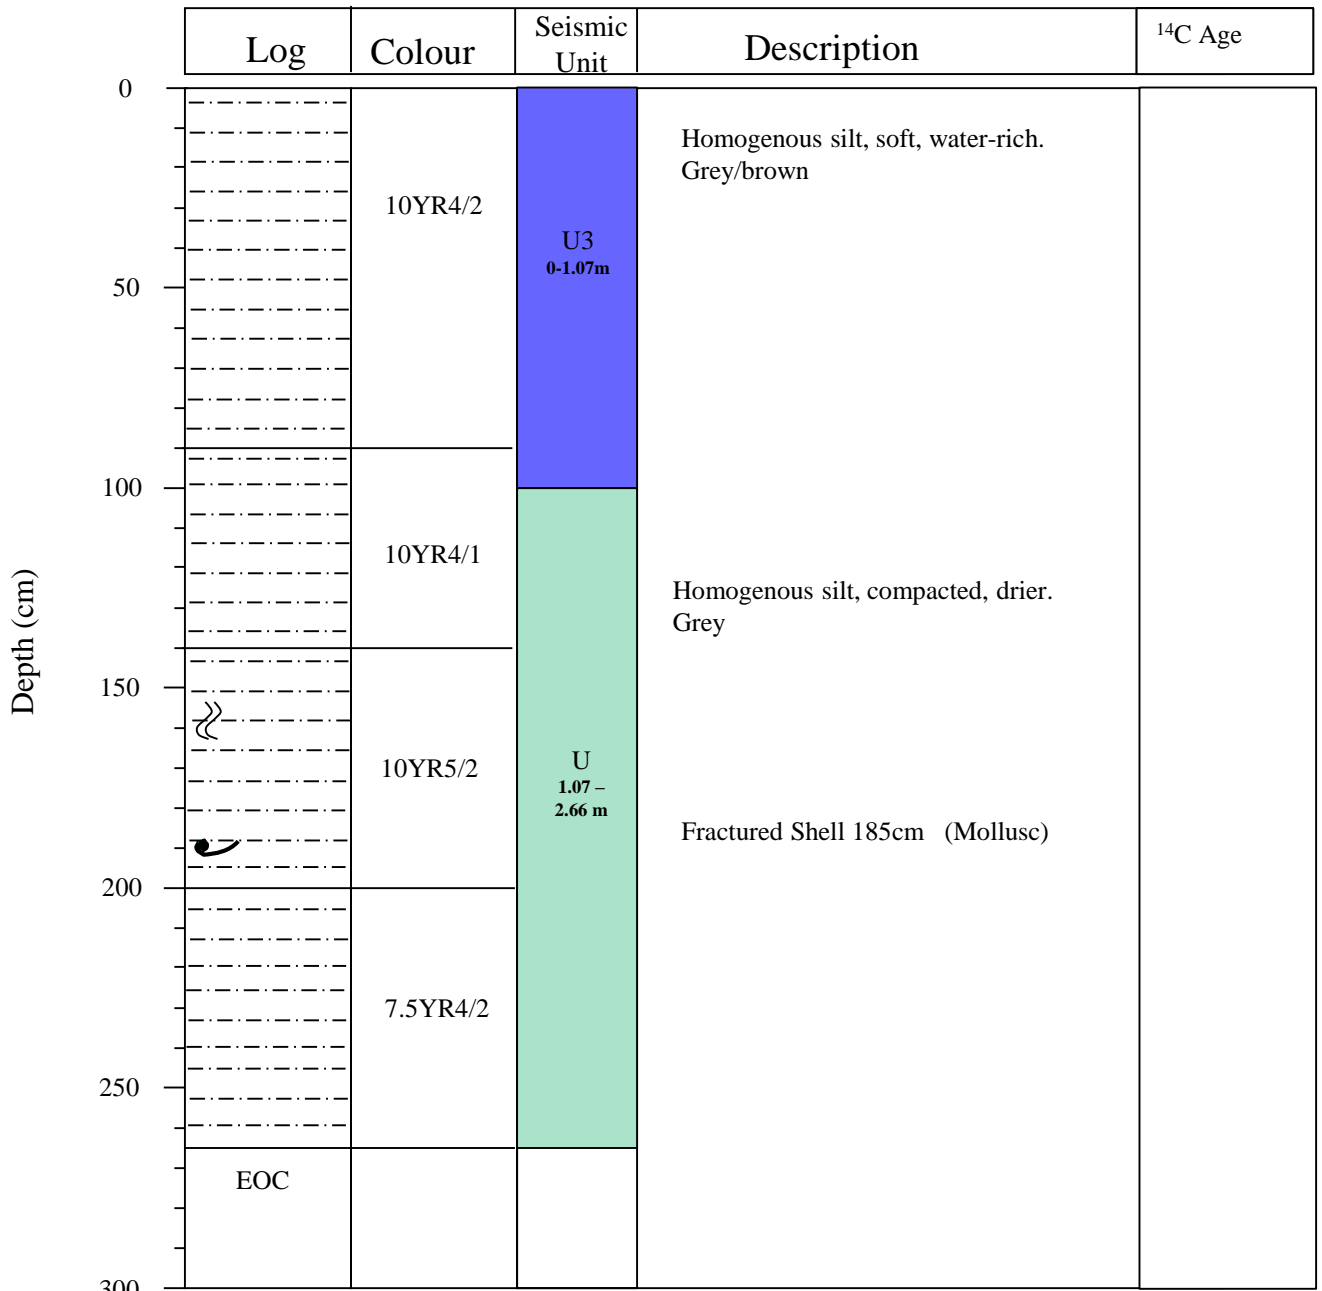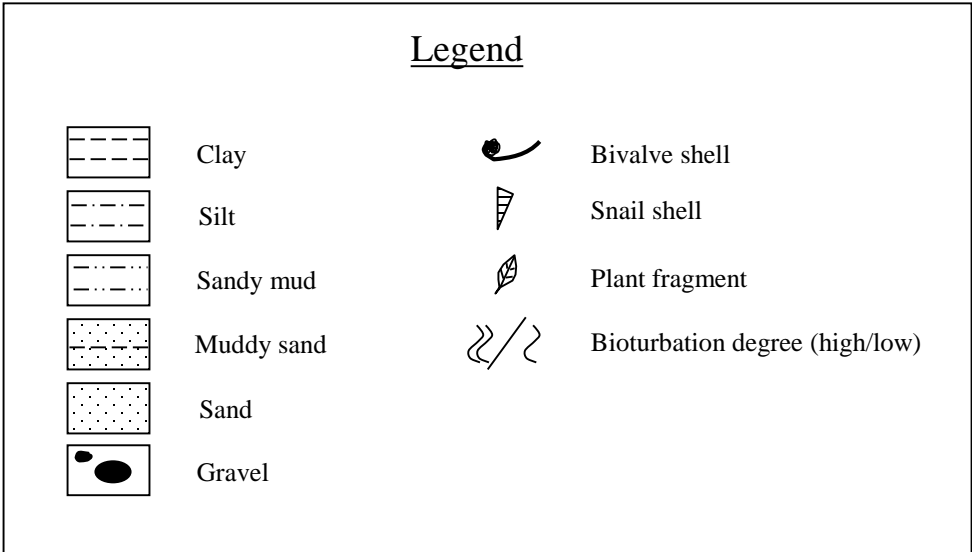

**Core no.: GC023, Loch Sunart: 56 40.324'N 05 50.328'W, Depth: 110m**

| Log                                                      | Colour             | Seismic Unit     | Description                                                                                                                                                                                                                      | <sup>14</sup> C Age   |
|----------------------------------------------------------|--------------------|------------------|----------------------------------------------------------------------------------------------------------------------------------------------------------------------------------------------------------------------------------|-----------------------|
| Depth (cm)<br>0<br>50<br>100<br>150<br>200<br>250<br>EOC | 10YR4/1<br>10YR3/1 | U3<br>0-1.02m    | 0-70 cm: Silty sandy mud, dark grey/very dark grey, water-rich soft, H <sub>2</sub> S smell, w. scattered mm-size shell fragments, bivalves, bioturbated<br><br>Very dark grey band (redox?)<br><br>Very dark grey band (redox?) | 30 cm<br>64 ± 51      |
|                                                          | 10YR4/1            |                  |                                                                                                                                                                                                                                  | 49 cm<br>788 ± 58     |
|                                                          | 10YR3/1<br>10YR4/1 |                  |                                                                                                                                                                                                                                  | 58 cm<br>886 ± 55     |
|                                                          | 5Y4/1<br>5Y3/1     |                  |                                                                                                                                                                                                                                  | 73 cm<br>1011 ± 66    |
|                                                          | 5Y4/1              |                  |                                                                                                                                                                                                                                  | 111.5 cm<br>1274 ± 59 |
|                                                          |                    |                  |                                                                                                                                                                                                                                  | 173cm: wood fragment  |
|                                                          |                    | U2<br>1.02-2.89m |                                                                                                                                                                                                                                  | 250 cm<br>1801 ± 80   |
|                                                          |                    |                  |                                                                                                                                                                                                                                  | 286cm<br>2099 ± 70    |

Legend

|                                                                                                                                                                                                                                                                                                                                                                                                                                                                                                                                                                                   |                                                                                                                                                                                                                                                                                                                                                                                                                                  |
|-----------------------------------------------------------------------------------------------------------------------------------------------------------------------------------------------------------------------------------------------------------------------------------------------------------------------------------------------------------------------------------------------------------------------------------------------------------------------------------------------------------------------------------------------------------------------------------|----------------------------------------------------------------------------------------------------------------------------------------------------------------------------------------------------------------------------------------------------------------------------------------------------------------------------------------------------------------------------------------------------------------------------------|
|  Clay<br> Silt<br> Sandy mud<br> Muddy sand<br> Sand<br> Gravel |  Bivalve shell<br> Snail shell<br> Plant fragment<br> Bioturbation degree (high/low) |
|-----------------------------------------------------------------------------------------------------------------------------------------------------------------------------------------------------------------------------------------------------------------------------------------------------------------------------------------------------------------------------------------------------------------------------------------------------------------------------------------------------------------------------------------------------------------------------------|----------------------------------------------------------------------------------------------------------------------------------------------------------------------------------------------------------------------------------------------------------------------------------------------------------------------------------------------------------------------------------------------------------------------------------|



**Core no.:** GC081, **Loch Sunart:** 56 40 139° N 05 51 797° W, **Depth:** 58 m

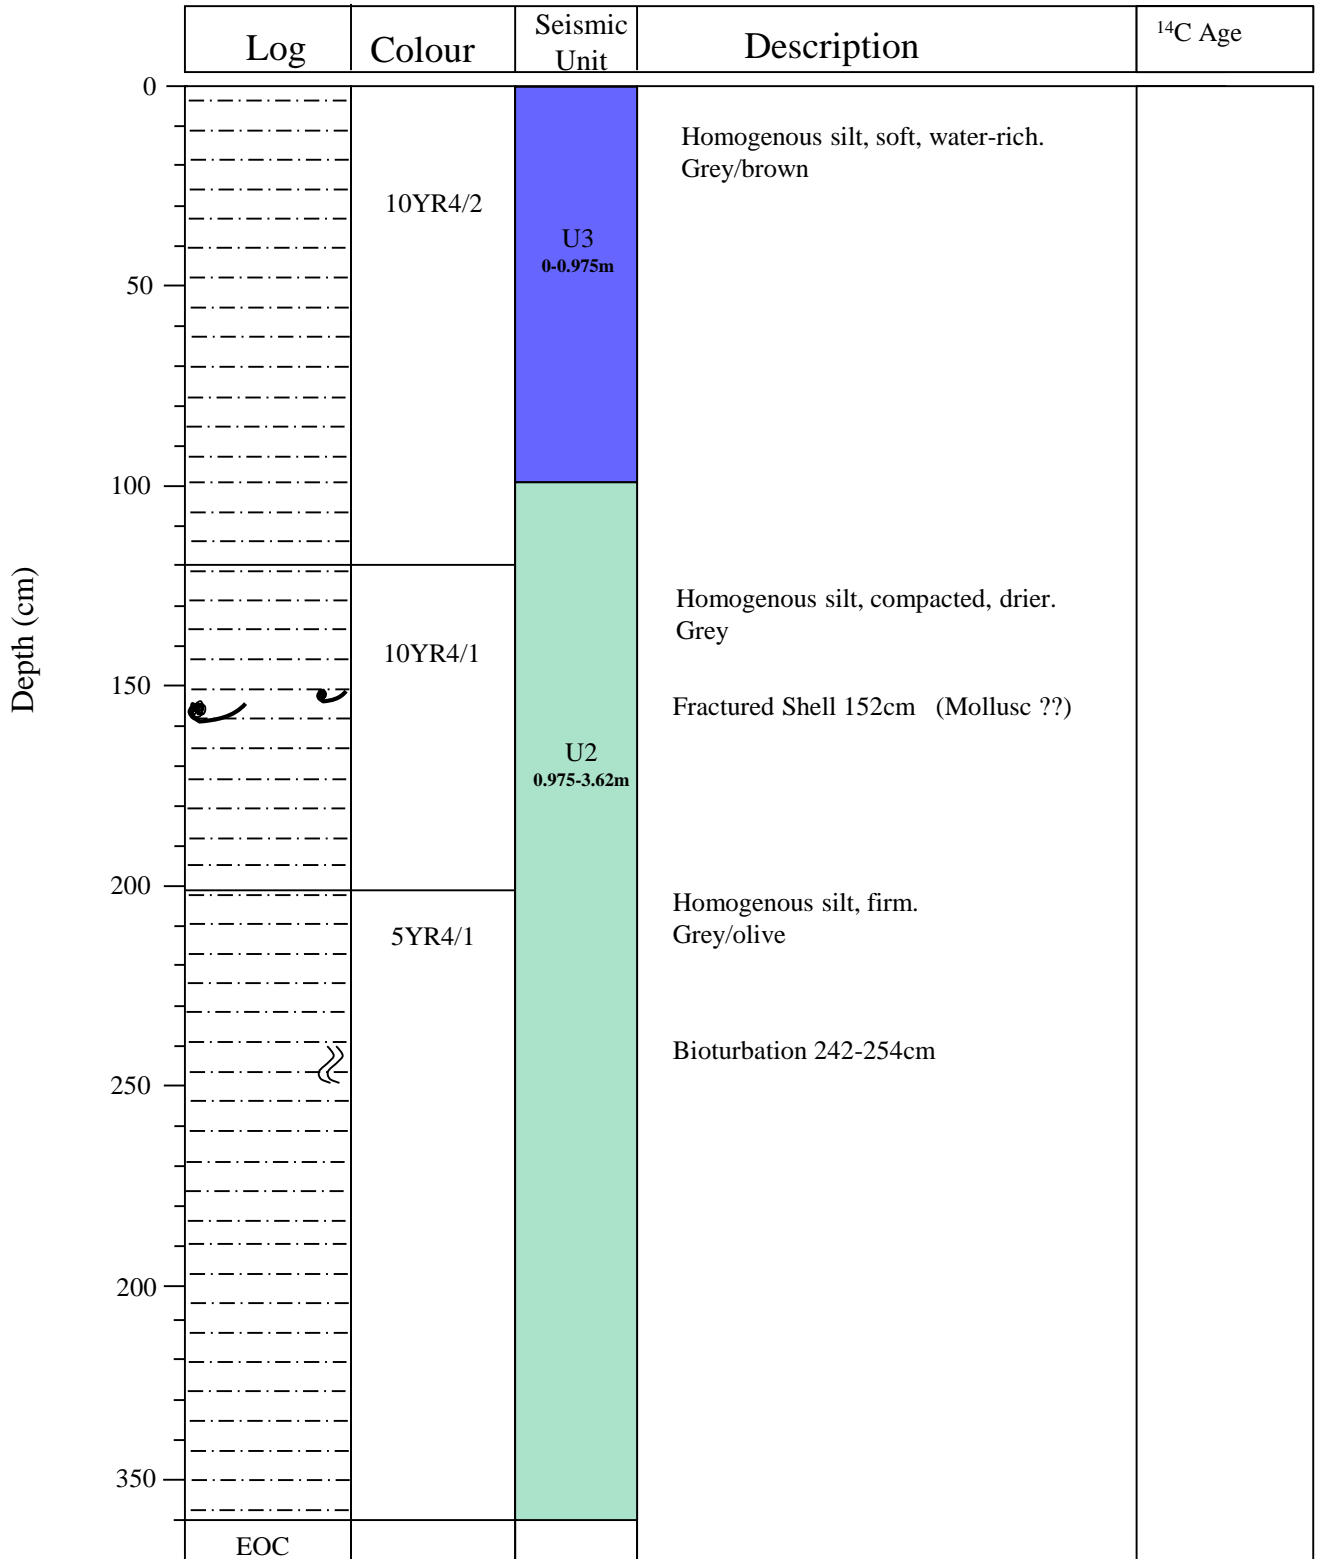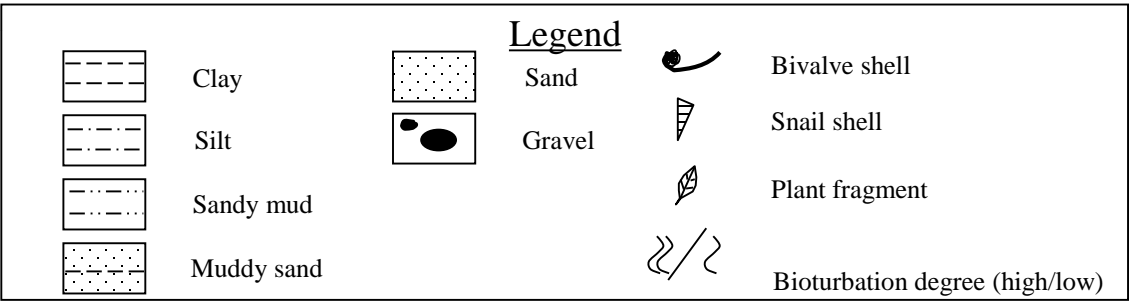

**Core no.: GC-01, Loch Sunart: 56° 41.809'N 5° 42.299'W, Depth:42 m**

| Log | Colour  | Seismic Unit | Description                                                | <sup>14</sup> C Age |
|-----|---------|--------------|------------------------------------------------------------|---------------------|
| EOC | 10YR4/1 | U3<br>0-0.2m | Silty sandy mud, dark grey/very dark grey water-rich, soft |                     |

Depth (cm)

0

50

100

150

Legend

|                                                                                                                                                                                                                                                                                                                                                                                                                                                                                                                                                       |                                |      |  |      |  |           |  |            |  |      |  |        |                                                                                                                                                                                                                                                                                                                                                                                                                                      |  |               |  |             |  |                |  |                                |
|-------------------------------------------------------------------------------------------------------------------------------------------------------------------------------------------------------------------------------------------------------------------------------------------------------------------------------------------------------------------------------------------------------------------------------------------------------------------------------------------------------------------------------------------------------|--------------------------------|------|--|------|--|-----------|--|------------|--|------|--|--------|--------------------------------------------------------------------------------------------------------------------------------------------------------------------------------------------------------------------------------------------------------------------------------------------------------------------------------------------------------------------------------------------------------------------------------------|--|---------------|--|-------------|--|----------------|--|--------------------------------|
| <table style="width: 100%; border-collapse: collapse;"> <tr> <td style="width: 30px; text-align: center;"></td> <td>Clay</td> </tr> <tr> <td style="width: 30px; text-align: center;"></td> <td>Silt</td> </tr> <tr> <td style="width: 30px; text-align: center;"></td> <td>Sandy mud</td> </tr> <tr> <td style="width: 30px; text-align: center;"></td> <td>Muddy sand</td> </tr> <tr> <td style="width: 30px; text-align: center;"></td> <td>Sand</td> </tr> <tr> <td style="width: 30px; text-align: center;"></td> <td>Gravel</td> </tr> </table> |                                | Clay |  | Silt |  | Sandy mud |  | Muddy sand |  | Sand |  | Gravel | <table style="width: 100%; border-collapse: collapse;"> <tr> <td style="width: 30px; text-align: center;"></td> <td>Bivalve shell</td> </tr> <tr> <td style="width: 30px; text-align: center;"></td> <td>Snail shell</td> </tr> <tr> <td style="width: 30px; text-align: center;"></td> <td>Plant fragment</td> </tr> <tr> <td style="width: 30px; text-align: center;"></td> <td>Bioturbation degree (high/low)</td> </tr> </table> |  | Bivalve shell |  | Snail shell |  | Plant fragment |  | Bioturbation degree (high/low) |
|                                                                                                                                                                                                                                                                                                                                                                                                                                                                                                                                                       | Clay                           |      |  |      |  |           |  |            |  |      |  |        |                                                                                                                                                                                                                                                                                                                                                                                                                                      |  |               |  |             |  |                |  |                                |
|                                                                                                                                                                                                                                                                                                                                                                                                                                                                                                                                                       | Silt                           |      |  |      |  |           |  |            |  |      |  |        |                                                                                                                                                                                                                                                                                                                                                                                                                                      |  |               |  |             |  |                |  |                                |
|                                                                                                                                                                                                                                                                                                                                                                                                                                                                                                                                                       | Sandy mud                      |      |  |      |  |           |  |            |  |      |  |        |                                                                                                                                                                                                                                                                                                                                                                                                                                      |  |               |  |             |  |                |  |                                |
|                                                                                                                                                                                                                                                                                                                                                                                                                                                                                                                                                       | Muddy sand                     |      |  |      |  |           |  |            |  |      |  |        |                                                                                                                                                                                                                                                                                                                                                                                                                                      |  |               |  |             |  |                |  |                                |
|                                                                                                                                                                                                                                                                                                                                                                                                                                                                                                                                                       | Sand                           |      |  |      |  |           |  |            |  |      |  |        |                                                                                                                                                                                                                                                                                                                                                                                                                                      |  |               |  |             |  |                |  |                                |
|                                                                                                                                                                                                                                                                                                                                                                                                                                                                                                                                                       | Gravel                         |      |  |      |  |           |  |            |  |      |  |        |                                                                                                                                                                                                                                                                                                                                                                                                                                      |  |               |  |             |  |                |  |                                |
|                                                                                                                                                                                                                                                                                                                                                                                                                                                                                                                                                       | Bivalve shell                  |      |  |      |  |           |  |            |  |      |  |        |                                                                                                                                                                                                                                                                                                                                                                                                                                      |  |               |  |             |  |                |  |                                |
|                                                                                                                                                                                                                                                                                                                                                                                                                                                                                                                                                       | Snail shell                    |      |  |      |  |           |  |            |  |      |  |        |                                                                                                                                                                                                                                                                                                                                                                                                                                      |  |               |  |             |  |                |  |                                |
|                                                                                                                                                                                                                                                                                                                                                                                                                                                                                                                                                       | Plant fragment                 |      |  |      |  |           |  |            |  |      |  |        |                                                                                                                                                                                                                                                                                                                                                                                                                                      |  |               |  |             |  |                |  |                                |
|                                                                                                                                                                                                                                                                                                                                                                                                                                                                                                                                                       | Bioturbation degree (high/low) |      |  |      |  |           |  |            |  |      |  |        |                                                                                                                                                                                                                                                                                                                                                                                                                                      |  |               |  |             |  |                |  |                                |

**Core no.:** MD04-2833 VIII, **Loch Sunart:**57 31.06N 08 23.17 ' W, **Depth:** 158 m

| Log  | Colour  | Seismic Unit        | Description                                          | <sup>14</sup> C Age   |                         |
|------|---------|---------------------|------------------------------------------------------|-----------------------|-------------------------|
| 1050 | 10YR4/2 | U1<br>18-<br>19.35m | Dry, heavily compacted. Glacial origin<br>Brown/grey | 745 cm<br>17041 ± 312 |                         |
| 1100 |         |                     | Cracking                                             |                       |                         |
|      |         |                     | Sand, course grain                                   |                       |                         |
| 1150 |         |                     | 10YR4/2                                              |                       | Sand, course grain      |
|      |         |                     | 10YR4/2                                              |                       | Sandy mud, course grain |
| 1200 | EOC     |                     |                                                      |                       |                         |
| 2000 |         |                     |                                                      |                       |                         |
| 2050 |         |                     |                                                      |                       |                         |
| 2100 |         |                     |                                                      |                       |                         |

Legend

- |                                                                                     |            |                                                                                     |                                |
|-------------------------------------------------------------------------------------|------------|-------------------------------------------------------------------------------------|--------------------------------|
|  | Clay       |  | Bivalve shell                  |
|  | Silt       |  | Snail shell                    |
|  | Sandy mud  |  | Plant fragment                 |
|  | Muddy sand |  | Bioturbation degree (high/low) |
|  | Sand       |                                                                                     |                                |
|  | Gravel     |                                                                                     |                                |
